# Supplementary material for: Modifiable Risk Factors for Common Ragweed (Ambrosia artemisiifolia) Allergy and Disease in Children: A Case-Control Study
Source: MDPI journal article supplement (doi:10.3390/ijerph15071339), 2018-06-26
Supplement: s1 [file s1]

**Table S1: Explanatory variables used in analysis**

| Variable Name       | Variable label                                                                                                               |
|---------------------|------------------------------------------------------------------------------------------------------------------------------|
| ID_SPT              | Child Identity                                                                                                               |
| Area                | Original pollen areas (4)                                                                                                    |
| pollen_Area         | Mean total pollen by Area                                                                                                    |
| pollen_nearest_code | Nearest pollen station to child home location                                                                                |
| pollen_totalmean    | mean pollen total mean by station                                                                                            |
| DateOfBirth         | Date of birth: Day (dd) of birth                                                                                             |
| Age                 | Age reported                                                                                                                 |
| Gender              | Gender                                                                                                                       |
| School_ID           | School Identification Number                                                                                                 |
| control_pos         | SPT wheal size result: (+) Control/Histamine (mm)                                                                            |
| control_neg         | SPT wheal size result: (-) Control (mm)                                                                                      |
| Trees               | SPT wheal size result: Trees mixtures (mm)                                                                                   |
| Birch               | SPT wheal size result: Birch (mm)                                                                                            |
| Hazel               | SPT wheal size result: Hazel (mm)                                                                                            |
| Grass               | SPT wheal size result: Grasses mix (mm)                                                                                      |
| Amb                 | SPT wheal size result: Ambrosia (mm)                                                                                         |
| Dog                 | SPT wheal size result: Dog hair (mm)                                                                                         |
| Cat                 | SPT wheal size result: Cat fur (mm)                                                                                          |
| Dustmite            | SPT wheal size result: D Pteronyssinus (mm)                                                                                  |
| Clado               | SPT wheal size result: Cladosporium (mm)                                                                                     |
| Pine                | SPT wheal size result: Pine (mm)                                                                                             |
| Olive               | SPT wheal size result: Olive (mm)                                                                                            |
| Parietaria          | SPT wheal size result: Parietaria (mm)                                                                                       |
| resp_infect_y1      | How often has your child had respiratory infections during the first year of life?                                           |
| resp_infect_y2      | How often has your child had respiratory infections during the second and third year of life?                                |
| fever_y1            | How often, during the first year of life, has your child had fever (higher than 38.5 °C)?                                    |
| fever1              | Child had fever higher than 38.5 °C during 1 year of live                                                                    |
| med_temp            | When do you give your child medicine for lowering body temperature?                                                          |
| anti_y1             | How often, during the first year of life, did your child take antibiotics for more than 3 days in a row?                     |
| anti_y23            | How often, during the second and third year of life, did your child take antibiotics for more than 3 days in a row?          |
| anti1               | Child had taken antibiotic s for more than 3 days in a row during 1 year of life                                             |
| worms               | Has your child ever been treated by the doctor because of abdominal pain caused by worm infection?                           |
| nursery             | Did your child ever go to a child care facility or nursery school?                                                           |
| nursery_start       | If yes (Q39), from ____ years of age? (in months)                                                                            |
| nursery_end         | If yes (Q39), till ____ years of age? (in months)                                                                            |
| kinder              | Did your child ever go to a kindergarten?                                                                                    |
| kinder_start        | If yes (Q40), from ____years of age? (in months)                                                                             |
| kinder_end          | If yes (Q40), till ____ years of age? (in months)                                                                            |
| nurs_kind_length    | Length of time (months) in nursery / kindergarten                                                                            |
| nurs_kind           | Percentage of life (or first seven years if older than 84 months) spent in either nursery or kindergarten                    |
| multibirth          | Is your child a twin, or a triplet/quadruplet?                                                                               |
| multibirth_num      | If yes (Q41), a twin, triplet, quadruplet?                                                                                   |
| sibling_count       | How many brothers and sisters does your child have?                                                                          |
| brothers            | How many brothers?                                                                                                           |
| sisters             | How many sisters?                                                                                                            |
| child_order         | Where does your child come in the family (firstborn, second....)?                                                            |
| siblings            | number of siblings the child has ( 0, 1 or more)                                                                             |
| atopic_fam          | Did any of your close family members had/s/ll have any atopic diseases, like asthma, allergic rhinitis or atopic dermatitis? |

|                       |                                                                                                                              |
|-----------------------|------------------------------------------------------------------------------------------------------------------------------|
| <b>atopic_fam_adj</b> | Did any of your close family members had/s/ll have any atopic diseases, like asthma, allergic rhinitis or atopic dermatitis? |
| <b>atopic_mem</b>     | If yes (Q44), which family members?                                                                                          |
| <b>asth_bro</b>       | How many brothers do/did suffer from asthma?                                                                                 |
| <b>rhin_bro</b>       | How many brothers do/did suffer from allergic rhinitis?                                                                      |
| <b>ecz_bro</b>        | How many brothers do/did suffer from atopic dermatitis?                                                                      |
| <b>atopic_bro</b>     | Has brother with asthma or allergic rhinitis or atopic dermatitis                                                            |
| <b>asth_sis</b>       | How many sisters do/did suffer from asthma?                                                                                  |
| <b>rhin_sis</b>       | How many sisters do/did suffer from allergic rhinitis?                                                                       |
| <b>ecz_sis</b>        | How many sisters do/did suffer from atopic dermatitis?                                                                       |
| <b>atopic_sis</b>     | Has sister with asthma or allergic rhinitis or atopic dermatitis                                                             |
| <b>asth_mum</b>       | Has the child's mother ever had asthma?                                                                                      |
| <b>rhin_mum</b>       | Has the child's mother ever had allergic rhinitis?                                                                           |
| <b>ecz_mum</b>        | Has the child's mother ever had atopic dermatitis (neurodermatitis, eczema)?                                                 |
| <b>atopic_mum</b>     | Has mother with asthma or allergic rhinitis or atopic dermatitis                                                             |
| <b>asth_dad</b>       | Has the child's father ever had asthma?                                                                                      |
| <b>rhin_dad</b>       | Has the child's father ever had allergic rhinitis?                                                                           |
| <b>ecz_dad</b>        | Has the child's father ever had atopic dermatitis (neurodermatitis, eczema)?                                                 |
| <b>atopic_dad</b>     | Has father with asthma or allergic rhinitis or atopic dermatitis                                                             |
| <b>atopic_parent</b>  | Has atopic father or mother?                                                                                                 |
| <b>atopic_parent2</b> | Has atopic father or mother?                                                                                                 |
| <b>Asth_PARENT</b>    | Any parent has/had asthma                                                                                                    |
| <b>Rhin_PARENT</b>    | Any parent has/had Rhinitis                                                                                                  |
| <b>Ecz_PARENT</b>     | Any parent has/had Eczema                                                                                                    |
| <b>dog_home</b>       | Do/did you keep a dog as a pet in your home?                                                                                 |
| <b>cat_home</b>       | Do/did you keep a cat as a pet in your home?                                                                                 |
| <b>ham_home</b>       | Do/did you keep a hamster as a pet in your home?                                                                             |
| <b>bird_home</b>      | Do/did you keep birds as a pet in your home?                                                                                 |
| <b>dog_contact</b>    | Did your child have regular contact with dogs (e.g., at your friend's home)?                                                 |
| <b>cat_contact</b>    | Did your child have regular contact with cats (e.g., at your friend's home)?                                                 |
| <b>ham_contact</b>    | Did your child have regular contact with hamsters (e.g., at your friend's home)?                                             |
| <b>bird_contact</b>   | Did your child have regular contact with birds (e.g., at your friend's home)?                                                |
| <b>pet</b>            | Child has/had contact cat, dog or hamster or at home                                                                         |
| <b>bird</b>           | Child has/had contact or bird at home                                                                                        |
| <b>poultry</b>        | Did your child have regular contact with poultry?                                                                            |
| <b>pigs</b>           | Did your child have regular contact with pigs?                                                                               |
| <b>cows</b>           | Did your child have regular contact with cows?                                                                               |
| <b>horses</b>         | Did your child have regular contact with horses?                                                                             |
| <b>rabbits</b>        | Did your child have regular contact with rabbits?                                                                            |
| <b>other_animals</b>  | Did your child have regular contact with any other animal?                                                                   |
| <b>AnimalFarm</b>     | Child has/had contact with a farm animal/ Farm (only no-yes)                                                                 |
| <b>sm_preg</b>        | Did your child's mother smoke during pregnancy with your child?                                                              |
| <b>cig_count_preg</b> | If yes (Q51), how many cigarettes a day?                                                                                     |
| <b>sm_home</b>        | Does anybody, at present, smoke inside your child's home?                                                                    |
| <b>sm_home_freq</b>   | If yes (Q52): how often did they smoke / during which stage of your child's life?                                            |
| <b>cig_home10</b>     | Are less than 10 cigarettes in total smoked per day in the child's home?                                                     |
| <b>cig_home20</b>     | Are 10-20 cigarettes in total smoked per day in the child's home?                                                            |
| <b>cig_home20plus</b> | Are > 20 cigarettes in total smoked per day in the child's home?                                                             |
| <b>sm_preg2</b>       | Mother smoking during pregnancy (recoded 1= yes + periodically)                                                              |
| <b>SMOKING</b>        | Smoking during pregnancy or smoking at home                                                                                  |
| <b>breastfed</b>      | Was your child breast fed?                                                                                                   |
| <b>breastfed_time</b> | If yes (Q54), for how long?                                                                                                  |
| <b>preg_anti</b>      | How often, during the pregnancy, was the child's mother on the antibiotics for more than                                     |
| <b>feather</b>        | Does or did your child sleep on a feather pillow?                                                                            |
| <b>feather_freq</b>   | How often does your child sleep on a feather pillow / during which stage of life?                                            |
| <b>mattage_y1</b>     | How old was the mattress that was used by your chi during the first year of life?                                            |

|                          |                                                                                                                                               |
|--------------------------|-----------------------------------------------------------------------------------------------------------------------------------------------|
| <b>mattage_y27</b>       | How old was the mattress that was used by your child from 2nd till 7th year of life?                                                          |
| <b>mattage_after7y</b>   | How old was the mattress that was used by your child after 7th year of life?                                                                  |
| <b>mattage</b>           | mattress older than 3 years at any stage of child life                                                                                        |
| <b>carpet</b>            | Is/was there a fitted carpet in your child's bedroom?                                                                                         |
| <b>carpet_freq</b>       | Frequency of fitted carpet in child's bedroom / stage of life?                                                                                |
| <b>gas</b>               | Do or did you use gas for heating in your child's home?                                                                                       |
| <b>oil</b>               | Do or did you use oil for heating in your child's home?                                                                                       |
| <b>elec</b>              | Do or did you use electricity for heating in your child's home?                                                                               |
| <b>wood</b>              | Do or did you use wood for heating in your child's home?                                                                                      |
| <b>coal</b>              | Do or did you use coal/coke for heating in your child's home?                                                                                 |
| <b>cen_heat</b>          | Do or did you use central heating in your child's home?                                                                                       |
| <b>gas1</b>              | Gas heating (only no-yes)                                                                                                                     |
| <b>oil1</b>              | Oil heating (only no-yes)                                                                                                                     |
| <b>elec1</b>             | Electric heating (only no-yes)                                                                                                                |
| <b>wood1</b>             | Wood heating (only no-yes)                                                                                                                    |
| <b>cen_heating1</b>      | Central heating (only no-yes)                                                                                                                 |
| <b>ed_mum</b>            | Mother: What is the highest level of education you have completed?                                                                            |
| <b>ed_dad</b>            | Father: What is the highest level of education you have completed?                                                                            |
| <b>employ_m</b>          | Mother is (employment status):                                                                                                                |
| <b>employ_d</b>          | Father is (employment status):                                                                                                                |
| <b>Placename_angl</b>    | What town do you live in?                                                                                                                     |
| <b>urban_rural_adj</b>   | Is the area you live in (rural/urban): (SEQ)                                                                                                  |
| <b>population_adj</b>    | If you live in an urban area, what is the population number?                                                                                  |
| <b>populationCat</b>     | Population quintiles                                                                                                                          |
| <b>farm</b>              | If you live in a rural area, do you live on a farm?                                                                                           |
| <b>income</b>            | Including wages, salaries, self-employment, and any other source of income, was the total combined family income during the one month period? |
| <b>adults_home</b>       | How many adults live in your household?                                                                                                       |
| <b>kids_home</b>         | How many children live in your household?                                                                                                     |
| <b>bedrooms</b>          | How many bedrooms are in your household (including children's room and guest rooms)?                                                          |
| <b>BEDROOMS</b>          | number of rooms in household                                                                                                                  |
| <b>airq_nearest_code</b> | Air quality station nearest to child home location                                                                                            |
| <b>O3_nearest_code</b>   | O3 station nearest to child home location                                                                                                     |
| <b>Weather_nearest</b>   | Weather station nearest to child home location                                                                                                |
| <b>Meantotal</b>         | Mean of total ragweed pollen counts/m3 per year                                                                                               |
| <b>Meanmax</b>           | Mean of maximum daily ragweed pollen counts/m3                                                                                                |
| <b>days5</b>             | number of days>5 pollen counts/m3                                                                                                             |
| <b>days10</b>            | number of days>10 pollen counts/m3                                                                                                            |
| <b>days15</b>            | number of days>15 pollen counts/m3                                                                                                            |
| <b>days20</b>            | number of days>20 pollen counts/m3                                                                                                            |
| <b>days25</b>            | number of days>25 pollen counts/m3                                                                                                            |
| <b>days30</b>            | number of days>30 pollen counts/m3                                                                                                            |
| <b>days50</b>            | number of days>50 pollen counts/m3                                                                                                            |
| <b>days100</b>           | number of days>100 pollen counts/m3                                                                                                           |
| <b>days200</b>           | number of days>200 pollen counts/m3                                                                                                           |
| <b>days500</b>           | number of days>500 pollen counts/m3                                                                                                           |
| <b>days1000</b>          | number of days>1000 pollen counts/m3                                                                                                          |
| <b>SO2_mean_d</b>        | SO2_mean_d ug/m3 daily mean                                                                                                                   |
| <b>SO2_mean_h</b>        | SO2_mean_h ug/m3 hourly mean                                                                                                                  |
| <b>PM10_mean_d</b>       | PM10_mean_d ug/m3 daily mean                                                                                                                  |
| <b>PM10_mean_h</b>       | PM10_mean_h ug/m3 hourly mean                                                                                                                 |
| <b>NO2_mean_d</b>        | NO2_mean_d ug/m3 daily mean                                                                                                                   |
| <b>NO2_mean_h</b>        | NO2_mean_h ug/m3 hourly mean                                                                                                                  |
| <b>O3_mean_d</b>         | O3_mean_d ug/m3 daily mean                                                                                                                    |
| <b>O3_mean_h</b>         | O3_mean_h ug/m3 hourly mean                                                                                                                   |
| <b>SO2_Area</b>          | Mean hourly SO2 by Area                                                                                                                       |

|                                 |                                                                                           |
|---------------------------------|-------------------------------------------------------------------------------------------|
| <b>PM10_Area</b>                | Mean hourly PM10 by Area                                                                  |
| <b>O3_Area</b>                  | Mean hourly O3 by Area                                                                    |
| <b>NO2_Area</b>                 | Mean hourly NO2 by Area                                                                   |
| <b>PT_DJF_19902010</b>          | PT_DJF_1990-2010 Precipitation mm Dec, Jan, Feb                                           |
| <b>PT_MAM_19902010</b>          | PT_MAM_1990-2010 Precipitation mm Mar, Apr, May                                           |
| <b>PT_JJA_19902010</b>          | PT_JJA_1990-2010 Precipitation mm Jun, Jul, Aug                                           |
| <b>PT_SON_19902010</b>          | PT_SON_1990-2010 Precipitation mm Sep, Oct, Nov                                           |
| <b>TG_DJF_19902012</b>          | TG_DJF_1990-2010 Mean daily temperature C Dec, Jan, Feb,                                  |
| <b>TG_MAM_19902012</b>          | TG_MAM_1990-2010 Mean daily temperature C Mar, Apr, May                                   |
| <b>TG_JJA_19902012</b>          | TG_JJA_1990-2010 Mean daily temperature C Jun, Jul, Aug                                   |
| <b>TG_SON_19902010</b>          | TG_SON_1990-2010 Mean daily temperature C Sep, Oct, Nov                                   |
| <b>Elevation</b>                | Elevation m                                                                               |
| <b>Continuousurbanfabric</b>    | Continuous urban fabric m2                                                                |
| <b>Discontinuousurbanfabric</b> | Discontinuous urban fabric m2                                                             |
| <b>Industrialor~</b>            | Industrial or commercial units m2                                                         |
| <b>Roadandrailne~</b>           | Road and rail networks and associated land m2                                             |
| <b>Portareas</b>                | Port areas m2                                                                             |
| <b>Airports</b>                 | Airports m2                                                                               |
| <b>Mineralextrac~</b>           | Mineral extraction sites m2                                                               |
| <b>Dumpsites</b>                | Dump sites m2                                                                             |
| <b>Constructionsites</b>        | Construction sites m2                                                                     |
| <b>Greenurbanareas</b>          | Green urban areas m2                                                                      |
| <b>Sportandleisu~</b>           | Sport and leisure facilities m2                                                           |
| <b>Nonirrigateda~</b>           | Non-irrigated arable land m2                                                              |
| <b>Permanentlyir~</b>           | Permanently irrigated land m2                                                             |
| <b>Ricefields</b>               | Rice fields m2                                                                            |
| <b>Vineyards</b>                | Vineyards m2                                                                              |
| <b>Fruittreesand~</b>           | Fruit trees and berry plantations m2                                                      |
| <b>Olivegroves</b>              | Olive groves m2                                                                           |
| <b>Pastures</b>                 | Pastures m2                                                                               |
| <b>Annualcropsas~</b>           | Annual crops associated with permanent crops m2                                           |
| <b>Complexcultiv~</b>           | Complex cultivation patterns m2                                                           |
| <b>Landprincipal~</b>           | Land principally occupied by agriculture, with significant areas of natural vegetation m2 |
| <b>Agroforestrya~</b>           | Agro-forestry areas m2                                                                    |
| <b>Broadleavedf~s</b>           | Broad-leaved forest m2                                                                    |
| <b>Coniferousfor~</b>           | Coniferous forest m2                                                                      |
| <b>Mixedforest</b>              | Mixed forest m2                                                                           |
| <b>Naturalgrassl~</b>           | Natural grasslands m2                                                                     |
| <b>Moorsandheath~</b>           | Moors and heathland m2                                                                    |
| <b>Sclerophyllou~</b>           | Sclerophyllous vegetation m2                                                              |
| <b>Transitionalw~</b>           | Transitional woodland-shrub m2                                                            |
| <b>Beachesdunes~</b>            | Beaches, dunes, sands m2                                                                  |
| <b>Barerocks</b>                | Bare rocks m2                                                                             |
| <b>Sparselyveget~</b>           | Sparsely vegetated areas m2                                                               |
| <b>Burntareas</b>               | Burnt areas m2                                                                            |
| <b>Glaciersandpe~</b>           | Glaciers and perpetual snow m2                                                            |
| <b>Inlandmarshes</b>            | Inland marshes m2                                                                         |
| <b>Peatbogs</b>                 | Peat bogs m2                                                                              |
| <b>Saltmarshes</b>              | Salt marshes m2                                                                           |
| <b>Salines</b>                  | Salines m2                                                                                |
| <b>Intertidalflat</b>           | Intertidal flats m2                                                                       |
| <b>Watercourses</b>             | Water courses m2                                                                          |
| <b>Waterbodies</b>              | Water bodies m2                                                                           |
| <b>Coastallagoons</b>           | Coastal lagoons m2                                                                        |
| <b>Estuaries</b>                | Estuaries m2                                                                              |

|                         |                                                                           |
|-------------------------|---------------------------------------------------------------------------|
| <b>Seaand</b> ocean     | Sea and ocean m2                                                          |
| <b>abandoned_5km</b>    | abandoned_5km m                                                           |
| <b>disused_5km</b>      | disused_5km m                                                             |
| <b>abandoned_or_~</b>   | Abandoned or disused 5 km buffer m                                        |
| <b>rail_5km</b>         | rail_5km m                                                                |
| <b>tram_5km</b>         | tram_5km m                                                                |
| <b>living_street</b>    | living_street m                                                           |
| <b>motorway</b>         | motorway m                                                                |
| <b>path</b>             | length of path in m                                                       |
| <b>pedestrian</b>       | length of pedestrian in m                                                 |
| <b>platform</b>         | length of platform in m                                                   |
| <b>primary</b>          | length of primary roads m                                                 |
| <b>residential</b>      | length of residential roads in m                                          |
| <b>road</b>             | length of road in m                                                       |
| <b>secondary</b>        | length of secondary roads m                                               |
| <b>service</b>          | length of service road in m                                               |
| <b>tertiary</b>         | length of tertiary roads m                                                |
| <b>trunk</b>            | length of trunk roads m                                                   |
| <b>unclassified</b>     | length of unclassified roads m                                            |
| <b>distancetonea~</b>   | distance to nearest motorway m                                            |
| <b>distan~maryroa</b>   | distance to nearest primary road m                                        |
| <b>distan~daryroa</b>   | distance to nearest secondary road m                                      |
| <b>distan~iaryroa</b>   | distance to nearest tertiary road m                                       |
| <b>river</b>            | length of rivers m                                                        |
| <b>stream</b>           | length of streams m                                                       |
| <b>all_water_bod~</b>   | All water bodies                                                          |
| <b>water</b>            | Waterbodies + Watercourses                                                |
| <b>waterCat</b>         | water thirds if wb >0                                                     |
| <b>ALLROADdistance</b>  | distance to primary, secondary or tertiary road                           |
| <b>rural_urban_code</b> | Rural or urban location of child home (GIS)                               |
| <b>VegArtificial</b>    | Sportandleisurefacilities + Greenurbanareas                               |
| <b>UrbanRoad</b>        | distance to roads in urban and rural areas                                |
| <b>UrbanRoad5</b>       | distance to primary, secondary or tertiary roads in urban and rural areas |
| <b>UrbanRoad4</b>       | distance to primary, secondary or tertiary roads in urban and rural areas |
